# Supplementary material for: Absolute rate constants for some hydrogen atom abstraction reactions by a primary fluoroalkyl radical in waterElectronic supplementary information (ESI) available: Tables of kinetic data and plots of kinetic data. See http://www.rsc.org/suppdata/ob/b3/b313757k/
Source: Royal Society of Chemistry journal article supplement (doi:10.1039/b313757k), 2004-01-01
Supplement: b313757k.doc [file b313757k.doc]

Supporting Information

**Absolute Rate Constants for Some Hydrogen Atom Abstraction Reactions by a Primary Fluoroalkyl Radical in Water**

# Li Zhang,[[1]](#footnote-2)† Joseph Cradlebaugh,Error: Reference source not found Grzegorz Litwinienko,[[2]](#footnote-3)§

# Bruce E. Smart,[[3]](#footnote-4)‡ Keith U. Ingold,Error: Reference source not found and William R. Dolbier, Jr.*Error: Reference source not found

Department of Chemistry, University of Florida, Gainesville, FL 32611-7200, DuPont Central Research and Development, Experimental Station, Wilmington, DE 19880, and National Research Council, 100 Sussex Drive, Ottawa, ON Canada K1A OR6

**Tables and Plots of Kinetic Data**

**Table S1.**  Rate Data for THF/THF-d8 Competition towards ·RfSO3Na Radicala

| [IRfSO3Na]  (mol· l-1) | [THF-d8]  (mol· l-1) | [THF]/  [THF-d8] | [HRfSO3Na]/  [DRfSO3Na] |
| --- | --- | --- | --- |
| 0.013 | 1.29 | 0.204 | 1.67 |
| 0.013 | 1.28 | 0.415 | 3.47 |
| 0.013 | 1.28 | 0.605 | 5.03 |
| 0.013 | 1.28 | 0.809 | 6.68 |
| 0.013 | 1.30 | 0.990 | 7.40 |
| 0.013 | 1.28 | 1.22 | 9.99 |

a All Yields Over 98%

**Figure S1.**  Plot of [**4**H]/[**4**D] vs. [THF]/[THF-d8]

*k*H/*k*D THF-d8 = Slope = 7.87 ( 0.38)

Intercept = 0.140 (0.296)

R2 = 0.991

**Table S2.**  Rate Data for Methanol/THF-d8 Competition towards ·RfSO3-Na+ Radicala

| [IRfSO3Na]  (mol· l-1) | [THF-d8]  (mol· l-1) | [CH3OH]/[THF-d8] | [HRfSO3Na]/  [DRfSO3Na] |
| --- | --- | --- | --- |
| 0.012 | 1.19 | 2.40 | 1.23 |
| 0.012 | 1.19 | 4.55 | 2.13 |
| 0.012 | 1.18 | 5.60 | 2.58 |
| 0.012 | 1.20 | 6.56 | 3.05 |

a All Yields Over 98%

**Figure S2.** Plot of [**4**H]/[**4**D] vs. [CH3OH]/[THF-d8]

*k*H/*k*D THF-d8 = Slope = 0.434 ( 0.010)

Intercept = 0.173 (0.051)

R2 = 0.999

**Table S3.** Rate Data for Ethanol /THF-d8 - Competition towards •RfSO3Naa

| **ENTRY** | [EtOH] / mol•l­-1 | [EtOH] / [THF-d8] | [**4**H]/[**4**D]b |
| --- | --- | --- | --- |
| 1 | .807 | .735 | 2.54 |
| 2 | 1.11 | 1.02 | 3.45 |
| 3 | 1.57 | 1.44 | 4.72 |
| 4 | 1.87 | 1.72 | 5.29 |
| 5 | 2.15 | 1.95 | 6.00 |
| 6 | 2.46 | 2.25 | 6.86 |

a [NaO3SCF2CF2OCF2CF2I] = .0108M for all runs; b All Yields Over 98%

Figure S3. Plot of [**4**H]/[**4**D] vs. [Ethanol]/[THF-d8]

*k*H/*k*D = Slope = 2.81 (±.069)

Intercept = .549 (±.111)

R2 = .998

**Table S4** Rate Data for isopropanol /THF-d8 competition towards •RfSO3Naa

| ENTRY | [*i*-PrOH] / mol•l­-1 | [*i*-PrOH] / [THF-d8] | [**4**H]/[**4**D]b |
| --- | --- | --- | --- |
| 1 | .138 | .127 | 1.60 |
| 2 | .253 | .229 | 2.94 |
| 3 | .356 | .322 | 4.04 |
| 4 | .595 | .541 | 6.43 |
| 5 | .706 | .649 | 7.74 |
| 6 | .825 | .753 | 8.78 |

a [NaO3SCF2CF2OCF2CF2I] = .0108M for all runs; b All Yields Over 98%

**See Figure 2 for plot of data**

*k*H/*k*D = Slope = 11.4 (±0.2)

Intercept = .270 (±.086)

R2 = .999

**Table S5.** Rate Data for Ethylene Glycol/THF-d8 Competition towards ·RfSO3-Na+ Radicala

| [IRfSO3Na]  (mol· l-1) | [THF-d8]  (mol· l-1) | [Ethylene Glycol]/  [THF-d8] | [HRfSO3Na]/  [DRfSO3Na] |
| --- | --- | --- | --- |
| 0.012 | 1.20 | 0.313 | 0.557 |
| 0.012 | 1.22 | 0.607 | 0.963 |
| 0.012 | 1.20 | 0.913 | 1.38 |
| 0.012 | 1.19 | 1.33 | 1.97 |
| 0.012 | 1.19 | 1.76 | 2.47 |
| 0.012 | 1.19 | 2.35 | 3.16 |

a All Yields Over 98%

**Figure S5.**  Plot of [**4**H]/[**4**D] vs. [Ethylene Glycol]/[THF-d8]

*k*H/*k*D THF-d8 = Slope = 1.28 ( 0.03)

Intercept = 0.195 (0.040)

R2 = 0.998

**Table S6.**  Rate Data for 2,3-Butanediol/THF-d8 Competition towards ·RfSO3-Na+ Radical

| [IRfSO3Na]  (mol· l-1) | [THF-d8]  (mol· l-1) | [2,3-butanediol]/  [THF-d8] | [HRfSO3Na]/  [DRfSO3Na] | Yield (%) |
| --- | --- | --- | --- | --- |
| 0.013 | 1.33 | 0.162 | 1.23 | 64 |
| 0.013 | 1.33 | 0.348 | 2.36 | 62 |
| 0.013 | 1.33 | 0.524 | 3.42 | 64 |
| 0.013 | 1.33 | 0.696 | 4.58 | 62 |
| 0.013 | 1.33 | 0.870 | 5.21 | 66 |
| 0.013 | 1.32 | 1.05 | 6.14 | 70 |

**Figure S6.** Plot of [**4**H]/[**4**D] vs. [2,3-Butanediol]/[THF-d8]

*k*H/*k*D THF-d8= Slope = 5.55 ( 0.23)

Intercept = 0.449 (0.155)

R2 = 0.993

**Table S7.**  Rate Data for Methyl Glycolate/THF-d8 Competition towards ·RfSO3Na Radical

| [IRfSO3Na]  (mol· l-1) | [THF-d8]  (mol· l-1) | [Methyl Glycolate]/  [THF-d8] | [HRfSO3Na]/  [DRfSO3Na] | Yield (%) |
| --- | --- | --- | --- | --- |
| 0.011 | 1.19 | 0.405 | 0.450 | 93 |
| 0.011 | 1.20 | 0.816 | 0.804 | 90 |
| 0.011 | 1.21 | 1.24 | 1.15 | 100 |
| 0.011 | 1.19 | 2.09 | 1.66 | 90 |
| 0.011 | 1.17 | 3.04 | 2.14 | 98 |
| 0.011 | 1.17 | 4.33 | 2.83 | 94 |

**Figure S7.**  Plot of [**4**H]/[**4**D] vs. [Methyl Glycolate]/[THF-d8]

*k*H/*k*D THF-d8= Slope = 0.593 ( 0.028)

Intercept = 0.328 (0.067)

R2 = 0.991

**Table S8.** Rate Data for Trifluoroethanol/THF-d8 Competition towards ·RfSO3Na Radical

| [IRfSO3Na]  (mol· l-1) | [THF-d8]  (mol· l-1) | [Trifluoroethanol]  [THF-d8] | [HRfSO3Na]/  [DRfSO3Na] | Yield (%) |
| --- | --- | --- | --- | --- |
| 0.011 | 0.232 | 4.27 | 0.158 | 100 |
| 0.011 | 0.223 | 6.69 | 0.203 | 100 |
| 0.011 | 0.223 | 8.82 | 0.260 | 100 |
| 0.011 | 0.221 | 11.1 | 0.286 | 100 |
| 0.011 | 0.218 | 14.6 | 0.348 | 100 |
| 0.011 | 0.218 | 17.9 | 0.421 | 100 |

**Figure S8.**  Plot of [**4**H]/[**4**D] vs. [CF3CH2OH]/[THF-d8]

*k*H/*k*D THF-d8 = Slope = 0.0188 ( 0.0007)

Intercept = 0.0803 (0.0085)

R 2 = 0.994

**Table S9.**  Rate Data for Hexafluoroisopropanol/CD3OD Competition towards ·RfSO3Na Radical

| [IRfSO3Na]  (mol· l-1) | [CD3OD]  (mol· l-1) | [(CF3)2CHOH]/  [CD3OD] | [HRfSO3Na]/  [DRfSO3Na] | Yield (%) |
| --- | --- | --- | --- | --- |
| 0.011 | 2.20 | 0.314 | 0.121 | 94 |
| 0.011 | 2.16 | 0.473 | 0.472 | 93 |
| 0.011 | 2.20 | 0.617 | 0.872 | 94 |
| 0.011 | 2.18 | 0.779 | 1.30 | 93 |
| 0.011 | 2.19 | 0.971 | 1.87 | 95 |
| 0.011 | 2.19 | 1.16 | 2.11 | 93 |

**Figure S9.**  Plot of [**4**H]/[**4**D] vs. [(CF3)2CHOH]/[CD3OD]

*k*H/*k*D CD3OD = Slope = 2.47 ( 0.12)

Intercept = -0.651 (0.093)

R 2 = 0.991

**Table S10.**  Rate Data for CH3OH/CD3OD Competition towards ·RfSO3Na Radical

| [IRfSO3Na]  (mol· l-1) | [CD3OD]  (mol· l-1) | [CH3OH]/  [CD3OD] | [HRfSO3Na]/  [DRfSO3Na] | Yield (%) |
| --- | --- | --- | --- | --- |
| 0.011 | 4.41 | 0.103 | 1.45 | 100 |
| 0.011 | 4.39 | 0.209 | 2.65 | 98 |
| 0.011 | 4.44 | 0.306 | 4.01 | 100 |
| 0.011 | 4.44 | 0.456 | 5.90 | 100 |
| 0.011 | 4.42 | 0.606 | 7.57 | 99 |
| 0.011 | 4.41 | 0.801 | 9.26 | 100 |

**Figure S10.**  Plot of [**4**H]/[**4**D] vs. [CH3OH]/[CD3OD]

*k*H/*k*D CD3OD = Slope = 11.4 ( 0.4)

Intercept = 0.413 (0.215)

R2 = 0.994

**Table S11.** Rate Data for Ethylene Glycol Dimethyl Ether/THF-d8 Competition towards

·RfSO3Na Radical

| [IRfSO3Na]  (mol· l-1) | [THF-d8]  (mol· l-1) | [(CH3OCH2)2]/  [THF-d8] | [HRfSO3Na]/  [DRfSO3Na] | Yield (%) |
| --- | --- | --- | --- | --- |
| 0.011 | 1.07 | 0.414 | 0.792 | 100 |
| 0.011 | 1.06 | 0.807 | 1.35 | 100 |
| 0.011 | 1.07 | 1.18 | 1.88 | 100 |
| 0.011 | 1.07 | 1.58 | 2.35 | 100 |
| 0.011 | 1.07 | 1.95 | 2.82 | 100 |
| 0.011 | 1.06 | 2.34 | 3.35 | 100 |

**Figure S11.**  Plot of [**4**H]/[**4**D] vs. [CH3OCH2CH2OCH3]/[THF-d8]

*k*H/*k*D THF-d8 = Slope = 1.31 (0.02)

Intercept = 0.280 (0.030)

R2 = 0.999

**Table S12.**  Rate Data for Acetone/THF-d8 Competition towards ·RfSO3-Na+ Radical

| [IRfSO3Na]  (mol· l-1) | [THF-d8]  (mol· l-1) | [Acetone]/  [THF-d8] | [HRfSO3Na]/  [DRfSO3Na] | Yield (%) |
| --- | --- | --- | --- | --- |
| 0.012 | 1.19 | 2.39 | 0.0953 | 96 |
| 0.012 | 1.19 | 3.57 | 0.117 | 100 |
| 0.012 | 1.19 | 4.46 | 0.126 | 100 |
| 0.012 | 1.19 | 5.65 | 0.144 | 100 |

**Figure S12.**  Plot of [**4**H]/[**4**D] vs. [Acetone]/[THF-d8]

*k*H/*k*D THF-d8 = Slope = 0.0146 ( 0.0010)

Intercept = 0.0619 (0.0043)

R2 = 0.990

**Table S13.**  Rate Data for Acetic Acid/THF-d8 Competition towards ·RfSO3-Na+ Radical

| [IRfSO3Na]  (mol· l-1) | [THF-d8]  (mol· l-1) | [Acetic Acid]/  [THF-d8] | [HRfSO3Na]/  [DRfSO3Na] | Yield (%) |
| --- | --- | --- | --- | --- |
| 0.012 | 1.18 | 3.10 | 0.0542 | 100 |
| 0.012 | 1.19 | 4.45 | 0.0589 | 100 |
| 0.012 | 1.20 | 5.76 | 0.0676 | 100 |
| 0.012 | 1.19 | 7.23 | 0.0685 | 100 |
| 0.012 | 1.19 | 8.60 | 0.0756 | 100 |
| 0.012 | 1.18 | 10.0 | 0.0881 | 100 |

**Figure S13.**  Plot of [**4**H]/[**4**D] vs. [Acetic Acid]/[THF-d8]

*k*H/*k*D THF-d8 = Slope = 0.00455 ( 0.00053)

Intercept = 0.0391 (0.0037)

R2 = 0.948

**Table S14.**  Rate Data for Sodium Acetate/THF-d8 Competition towards ·RfSO3Na Radical

| [IRfSO3Na]  (mol· l-1) | [THF-d8]  (mol· l-1) | [CH3COONa]/  [THF-d8] | [HRfSO3Na]/  [DRfSO3Na] | Yield (%) |
| --- | --- | --- | --- | --- |
| 0.011 | 0.214 | 3.53 | 0.182 | 100 |
| 0.011 | 0.217 | 4.62 | 0.225 | 100 |
| 0.011 | 0.217 | 5.78 | 0.277 | 100 |
| 0.011 | 0.217 | 6.94 | 0.308 | 100 |
| 0.011 | 0.214 | 9.70 | 0.381 | 100 |
| 0.011 | 0.212 | 12.2 | 0.431 | 100 |

**Figure S14.**  Plot of [**4**H]/[**4**D]vs. [CH3COONa]/[THF-d8]

*k*H/*k*D THF-d8 = Slope = 0.0284 ( 0.0020)

Intercept = 0.0985 (0.0159)

R2 = 0.979

**Table S15.**  Rate Data for Propionic Acid/THF-d8 Competition towards · RfSO3-Na+ Radical

| [IRfSO3Na]  (mol· l-1) | [THF-d8]  (mol· l-1) | [CH3CH2COOH]/  [THF-d8] | [HRfSO3Na]/  [DRfSO3Na] | Yield (%) |
| --- | --- | --- | --- | --- |
| 0.012 | 1.20 | 1.48 | 0.382 | 93 |
| 0.012 | 1.20 | 2.55 | 0.534 | 100 |
| 0.012 | 1.20 | 3.61 | 0.749 | 100 |
| 0.012 | 1.20 | 4.66 | 0.923 | 100 |
| 0.012 | 1.19 | 5.82 | 1.16 | 100 |

**Figure S15.**  Plot of [**4**H]/[**4**D] vs. [CH3CH2COOH]/[THF-d8]

*k*H/*k*D THF-d8 = Slope = 0.180 ( 0.006)

Intercept = 0.0959 (0.0234)

R2 = 0.997

**Table S16.**  Rate Data for Sodium Propionate/THF-d8 Competition towards · RfSO3-Na+ Radical

| [IRfSO3Na]  (mol· l-1) | [THF-d8]  (mol· l-1) | [CH3CH2COONa]/  [THF-d8] | [HRfSO3Na]/  [DRfSO3Na] | Yield (%) |
| --- | --- | --- | --- | --- |
| 0.013 | 1.28 | 0.288 | 0.181 | 98 |
| 0.013 | 1.29 | 0.484 | 0.265 | 96 |
| 0.013 | 1.29 | 0.778 | 0.373 | 95 |
| 0.013 | 1.29 | 1.13 | 0.464 | 94 |
| 0.013 | 1.28 | 1.42 | 0.610 | 95 |

**Figure S16.**  Plot of [**4**H]/[**4**D] vs. [CH3CH2COONa]/[THF-d8]

*k*H/*k*D THF-d8 = Slope = 0.362 ( 0.021)

Intercept = 0.0820 (0.0190)

R2 = 0.990

**Table S17.**  Rate Data for 2-Mercaptoethanesulfonic Acid, Sodium Salt/THF-d8 Competition towards · RfSO3-Na+ Radical

| [IRfSO3Na]  (mol· l-1) | [THF-d8]  (mol· l-1) | [HSCH2CH2SO3Na]/  [THF-d8] | [HRfSO3Na]/  [DRfSO3Na] | Yield (%) |
| --- | --- | --- | --- | --- |
| 0.011 | 0.677 | 0.174 | 20.1 | 97 |
| 0.011 | 0.677 | 0.232 | 27.3 | 97 |
| 0.011 | 0.675 | 0.291 | 29.1 | 97 |
| 0.011 | 0.673 | 0.349 | 38.9 | 96 |
| 0.011 | 0.675 | 0.408 | 41.0 | 96 |
| 0.011 | 0.682 | 0.460 | 48.7 | 97 |

**Figure S17.**  Plot of [**4**H]/[**4**D] vs. [HSCH2CH2SO3Na]/[THF-d8]

*k*H/*k*D THF-d8 = Slope = 96.0 ( 8.1)

Intercept = 3.54 (2.70)

R2 = 0.972

**Table S18.**  Rate Data for (HOCH2CH2CH2)3SiH/THF-d8 Competition towards ·RfSO3Na Radical

| [IRfSO3Na]  (mol· l-1) | [THF-d8]  (mol· l-1) | [Silane]/  [THF-d8] | [HRfSO3Na]/  [DRfSO3Na] | Yield (%) |
| --- | --- | --- | --- | --- |
| 0.0079 | 0.487 | 0.131 | 3.46 | 100 |
| 0.0079 | 0.479 | 0.160 | 4.04 | 100 |
| 0.0079 | 0.483 | 0.185 | 5.12 | 100 |
| 0.0079 | 0.485 | 0.211 | 5.74 | 100 |
| 0.0079 | 0.489 | 0.261 | 7.02 | 100 |

**Figure S18.** Plot of [**4**H]/[**4**D] vs. [(HOCH2CH2CH2)3SiH]/[THF-d8]

*k*H/*k*D THF-d8= Slope = 28.1 ( 1.6)

Intercept = -0.258 (0.321)

R2 = 0.990

**Table S19.**  Rate Data for Me3N+CH2SiMe2H Br-/THF-d8 Competition towards ·RfSO3Na Radical

| [IRfSO3Na]  (mol· l-1) | [THF-d8]  (mol· l-1) | [Silane]/  [THF-d8] | [HRfSO3Na]/  [DRfSO3Na] | Yield (%) |
| --- | --- | --- | --- | --- |
| 0.011 | 0.655 | 0.0673 | 1.01 | 100 |
| 0.011 | 0.671 | 0.164 | 3.05 | 100 |
| 0.011 | 0.662 | 0.333 | 6.85 | 100 |
| 0.011 | 0.672 | 0.492 | 9.63 | 100 |

**Figure S19.**  Plot of [**4**H]/[**4**D] vs. [B rMe3NCH2SiMe2H]/[THF-d8]

*k*H/*k*D THF-d8 = Slope = 20.5 ( 0.8)

Intercept = -0.283 (0.245)

R2 = 0.997

**Table S20.**  Rate Data for Phosphorus Acid/THF-d8 Competition towards ·RfSO3Na Radical

| [IRfSO3Na]  (mol· l-1) | [THF-d8]  (mol· l-1) | [H3PO3]/  [THF-d8] | [HRfSO3Na]/  [DRfSO3Na] | Yield (%) |
| --- | --- | --- | --- | --- |
| 0.011 | 1.08 | 0.271 | 1.73 | 100 |
| 0.011 | 1.09 | 0.536 | 2.79 | 100 |
| 0.011 | 1.09 | 0.804 | 3.68 | 100 |
| 0.011 | 1.09 | 1.07 | 4.79 | 100 |
| 0.011 | 1.09 | 1.34 | 5.46 | 100 |
| 0.011 | 1.09 | 1.61 | 6.43 | 100 |

**Figure S20.**  Plot of [**4**H]/[**4**D] vs. [H3PO3]/[THF-d8]

*k*H/*k*D THF-d8 = Slope = 3.48 ( 0.10)

Intercept = 0.881 (0.109)

R2 = 0.996

**Table S21.** Rate Data for CH3CH2OH/*t*-BuSiMe2D Competition towards ·C4F9 Radical in 1,3-BTB at 308K, Initiated with (tBuON)2

| [C4F9I]  (mol· l-1) | [t-BuSiMe2D]  (mol· l-1) | [CH3CH2OH]/  [t-BuSiMe2D] | [C4F9H]/  [C4F9D] | Yield (%) |
| --- | --- | --- | --- | --- |
| 0.059 | 0.544 | 2.99 | 0.230 | 32 |
| 0.053 | 0.548 | 4.07 | 0.255 | 51 |
| 0.052 | 0.542 | 5.26 | 0.261 | 61 |
| 0.053 | 0.548 | 6.95 | 0.303 | 62 |
| 0.053 | 0.542 | 9.32 | 0.338 | 74 |
| 0.053 | 0.544 | 11.6 | 0.412 | 80 |

**Figure S21.**  Plot of [C4F9H]/[C4F9D] vs. [CH3CH2OH]/[t-BuSiMe2D]

*k*H/*k*D t-BuSiMe2D = Slope = 0.0202 ( 0.0016)

Intercept = 0.165 (0.012)

R2 = 0.974

*k*H = 3.01 (0.65) x 103 M

**Table S22. Rate constants (kgl) for RfSO3¯ + sodium 4-(1-propenyl)benzoate, 2, in water.**

| [**2**]  / M | kex  / s-1 |  | [**2**]  / M | kex  / s-1 |
| --- | --- | --- | --- | --- |
| 4.43E-03 | 2.00E+05 |  | 5.89E-03 | 2.38E+05 |
| 3.64E-03 | 1.38E+05 |  | 4.16E-03 | 1.81E+05 |
| 2.82E-03 | 1.15E+05 |  | 3.21E-03 | 1.32E+05 |
| 1.94E-03 | 1.09E+05 |  | 2.21E-03 | 1.08E+05 |
| 1.38E-03 | 6.53E+04 |  | 1.68E-03 | 7.27E+04 |
| 9.99E-04 | 4.61E+04 |  |  |  |
|  |  |  |  |  |
| slope*a* = | 3.96E+07 |  | slope *a* = | 3.86E+07 |
| R2= | 0.9313 |  | R2= | 0.9882 |
| std err slope= | 5.4E+06 |  | std err slope= | 2.4E+06 |
| confidence interval*b*= | 1.0E+07 |  | confidence interval*b* = | 4.9E+06 |
| **kgl = (4.0  1.0 )  107 M-1s-1** | |  | **kgl = (3.9  0.5 )  107 M-1s-1** | |

a –slope of the plot of *k*ex vs. [**2**]. *b -* calculated for 90% confidence level.

**Table S23.** Rate constants (**kH**) for H atom abstraction from tetrahydrofuran by RfSO3¯ in water.

| [*H-donor*]  / M | *k*ex  / s-1 | [**2**]  / M | *k*ex – *k*gl [**2**]  / s-1 |  |  |
| --- | --- | --- | --- | --- | --- |
| entry 1 |  |  |  |  |  |
| 0.000 | 6.23E+04 | 1.57E-03 | 2.03E+03 |  |  |
| 0.184 | 7.13E+04 | 1.57E-03 | 1.10E+04 | slope a = | 3.9E+04 |
| 0.367 | 8.49E+04 | 1.57E-03 | 2.47E+04 | R2= | 0.9800 |
| 0.730 | 9.56E+04 | 1.57E-03 | 3.54E+04 | std err slope= | 3.2E+03 |
| 1.470 | 1.22E+05 | 1.57E-03 | 6.12E+04 | confidence interval *b* = | 6.5E+03 |
|  |  |  |  | **kH** = (3.9  0.7)  104 M-1s-1 | |
| entry 2 |  |  |  |  |  |
| 0.000 | 7.04E+04 | 1.70E-03 | 5.10E+03 |  |  |
| 0.129 | 7.35E+04 | 1.70E-03 | 8.22E+03 |  |  |
| 0.194 | 7.96E+04 | 1.70E-03 | 1.43E+04 |  |  |
| 0.290 | 7.99E+04 | 1.70E-03 | 1.47E+04 |  |  |
| 0.436 | 8.39E+04 | 1.70E-03 | 1.86E+04 | slope a = | 3.2E+04 |
| 0.653 | 8.96E+04 | 1.70E-03 | 2.43E+04 | R2= | 0.9907 |
| 0.980 | 1.04E+05 | 1.70E-03 | 3.85E+04 | std err slope= | 1.3E+03 |
| 1.470 | 1.18E+05 | 1.70E-03 | 5.24E+04 | confidence interval *b* = | 2.4E+03 |
|  |  |  |  | **kH** = (3.2  0.2)  104 M-1s-1 | |
| entry 3 |  |  |  |  |  |
| 0.000 | 8.33E+04 | 1.68E-03 | 1.89E+04 |  |  |
| 0.194 | 8.93E+04 | 1.68E-03 | 2.49E+04 |  |  |
| 0.290 | 9.22E+04 | 1.68E-03 | 2.78E+04 | slope a = | 3.45E+04 |
| 0.653 | 9.76E+04 | 1.68E-03 | 3.32E+04 | R2= | 0.9707 |
| 0.980 | 1.14E+05 | 1.68E-03 | 5.00E+04 | std err slope | 3.0E+03 |
| 1.470 | 1.35E+05 | 1.68E-03 | 7.06E+04 | confidence interval *b* = | 5.8E+03 |
|  |  |  |  | **kH** = (3.5  0.6)  104 M-1s-1 | |
| entry 4 |  |  |  |  |  |
| 0.000 | 6.69E+04 | 1.62E-03 | 4.79E+03 |  |  |
| 0.201 | 7.66E+04 | 1.62E-03 | 1.45E+04 |  |  |
| 0.301 | 8.08E+04 | 1.62E-03 | 1.87E+04 |  |  |
| 0.452 | 8.44E+04 | 1.62E-03 | 2.23E+04 |  |  |
| 0.678 | 8.93E+04 | 1.62E-03 | 2.72E+04 |  |  |
| 1.016 | 9.92E+04 | 1.62E-03 | 3.71E+04 | slope a = | 2.8E+04 |
| 1.524 | 1.12E+05 | 1.62E-03 | 4.99E+04 | R2= | 0.9938 |
| 2.287 | 1.39E+05 | 1.62E-03 | 7.66E+04 | std err slope= | 8.5E+02 |
| 2.940 | 1.51E+05 | 1.62E-03 | 8.86E+04 | confidence interval *b* = | 1.6E+03 |
|  |  |  |  | **kH** = (2.8  0.2)  104 M-1s-1 | |
|  |  |  |  |  |  |

*continued...*

**Table S23.** *continued*

| [*H-donor*]  / M | *k*ex  / s-1 | [**2**]  / M | *k*ex – *k*gl [**2**]  / s-1 |  |  |
| --- | --- | --- | --- | --- | --- |
| entry 5 |  |  |  |  |  |
| 0.000 | 7.62E+04 | 1.70E-03 | 1.10E+04 |  |  |
| 0.201 | 7.94E+04 | 1.70E-03 | 1.42E+04 |  |  |
| 0.301 | 8.70E+04 | 1.70E-03 | 2.18E+04 |  |  |
| 0.452 | 9.30E+04 | 1.70E-03 | 2.78E+04 |  |  |
| 0.677 | 9.45E+04 | 1.70E-03 | 2.93E+04 | slope a = | 3.2E+04 |
| 1.016 | 1.13E+05 | 1.70E-03 | 4.78E+04 | R2= | 0.9876 |
| 1.524 | 1.30E+05 | 1.70E-03 | 6.48E+04 | std err slope= | 1.5E+03 |
| 2.940 | 1.67E+05 | 1.70E-03 | 1.02E+05 | confidence interval *b* = | 2.7E+03 |
|  |  |  |  | **kH** = (3.2  0.3)  104 M-1s-1 | |
|  |  |  |  |  |  |

*a* –slope of the plot of (*k*ex – *k*gl [**2**]) *vs*. [**2**]. *b -* calculated for 90% confidence level.

**Table S24.** Rate constants (**kH**) for H atom abstraction from 2-propanol by RfSO3¯ in water.

| [*H-donor*]  / M | kex  / s-1 | [**2**]  / M | kex – kgl [**2**]  / s-1 |  |  |
| --- | --- | --- | --- | --- | --- |
| entry 1 |  |  |  |  |  |
| 0.000 | 4.96E+04 | 1.40E-03 | -4.39E+3 |  |  |
| 0.478 | 6.56E+04 | 1.40E-03 | 1.17E+04 |  |  |
| 0.720 | 8.26E+04 | 1.40E-03 | 2.87E+04 |  |  |
| 1.080 | 9.47E+04 | 1.40E-03 | 4.07E+04 | slope= | 4.09E+04 |
| 1.610 | 1.22E+05 | 1.40E-03 | 6.79E+04 | R2= | 0.9945 |
| 2.420 | 1.46E+05 | 1.40E-03 | 9.19E+04 | std err slope= | 1.2E+03 |
| 3.110 | 1.76E+05 | 1.40E-03 | 1.22E+05 | confidence interval *b* = | 2.3E+03 |
|  |  |  |  | **kH** = (4.1  0.2)  104 M-1s-1 | |
|  |  |  |  |  |  |
| entry 2 |  |  |  |  |  |
| 0.000 | 7.20E+04 | 1.76E-03 | 4.07E+03 |  |  |
| 0.478 | 8.82E+04 | 1.76E-03 | 2.03E+04 |  |  |
| 0.720 | 9.88E+04 | 1.76E-03 | 3.09E+04 |  |  |
| 1.080 | 1.03E+05 | 1.76E-03 | 3.51E+04 | slope= | 3.95E+04 |
| 1.610 | 1.22E+05 | 1.76E-03 | 5.41E+04 | R2= | 0.9839 |
| 2.420 | 1.66E+05 | 1.76E-03 | 9.81E+04 | std err slope= | 2.3E+03 |
| 3.110 | 1.94E+05 | 1.76E-03 | 1.26E+05 | confidence interval *b* = | 4.3E+03 |
|  |  |  |  | **kH** = (3.9  0.4)  104 M-1s-1 | |

*a* –slope of the plot of (*k*ex – *k*gl [**2**]) *vs*. [**2**]. *b -* calculated for 90% confidence level.

1. † University of Florida [↑](#footnote-ref-2)
2. § National Research Council [↑](#footnote-ref-3)
3. ‡ DuPont Central Research & Development, DuPont Contribution No. 8347 [↑](#footnote-ref-4)
